# Supplementary material for: Multivariate gene expression analysis reveals functional connectivity changes between normal/tumoral prostates
Source: Springer Nature journal article supplement (doi:10.1186/1752-0509-2-106), 2008-12-01
Supplement: 12918_2008_263_MOESM4_ESM.pdf [file 12918_2008_263_MOESM4_ESM.pdf]

microarrays

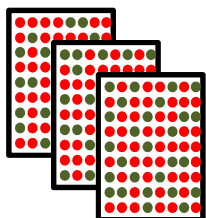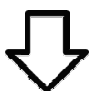

PCA

MLDA

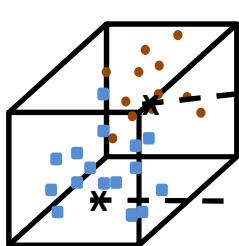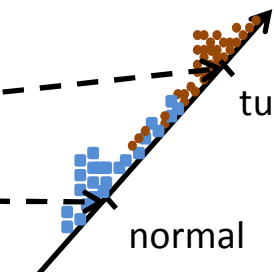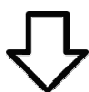

feature

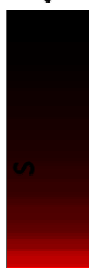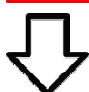

Network modeling

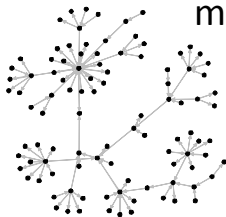

Normal

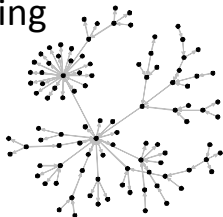

Tumor

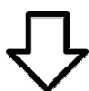

Network analysis

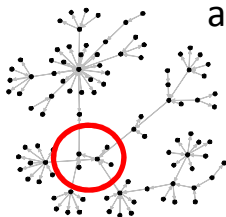

Normal

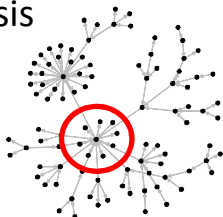

Tumor
