# Supplementary material for: Multivariate gene expression analysis reveals functional connectivity changes between normal/tumoral prostates
Source: Springer Nature journal article supplement (doi:10.1186/1752-0509-2-106), 2008-12-01

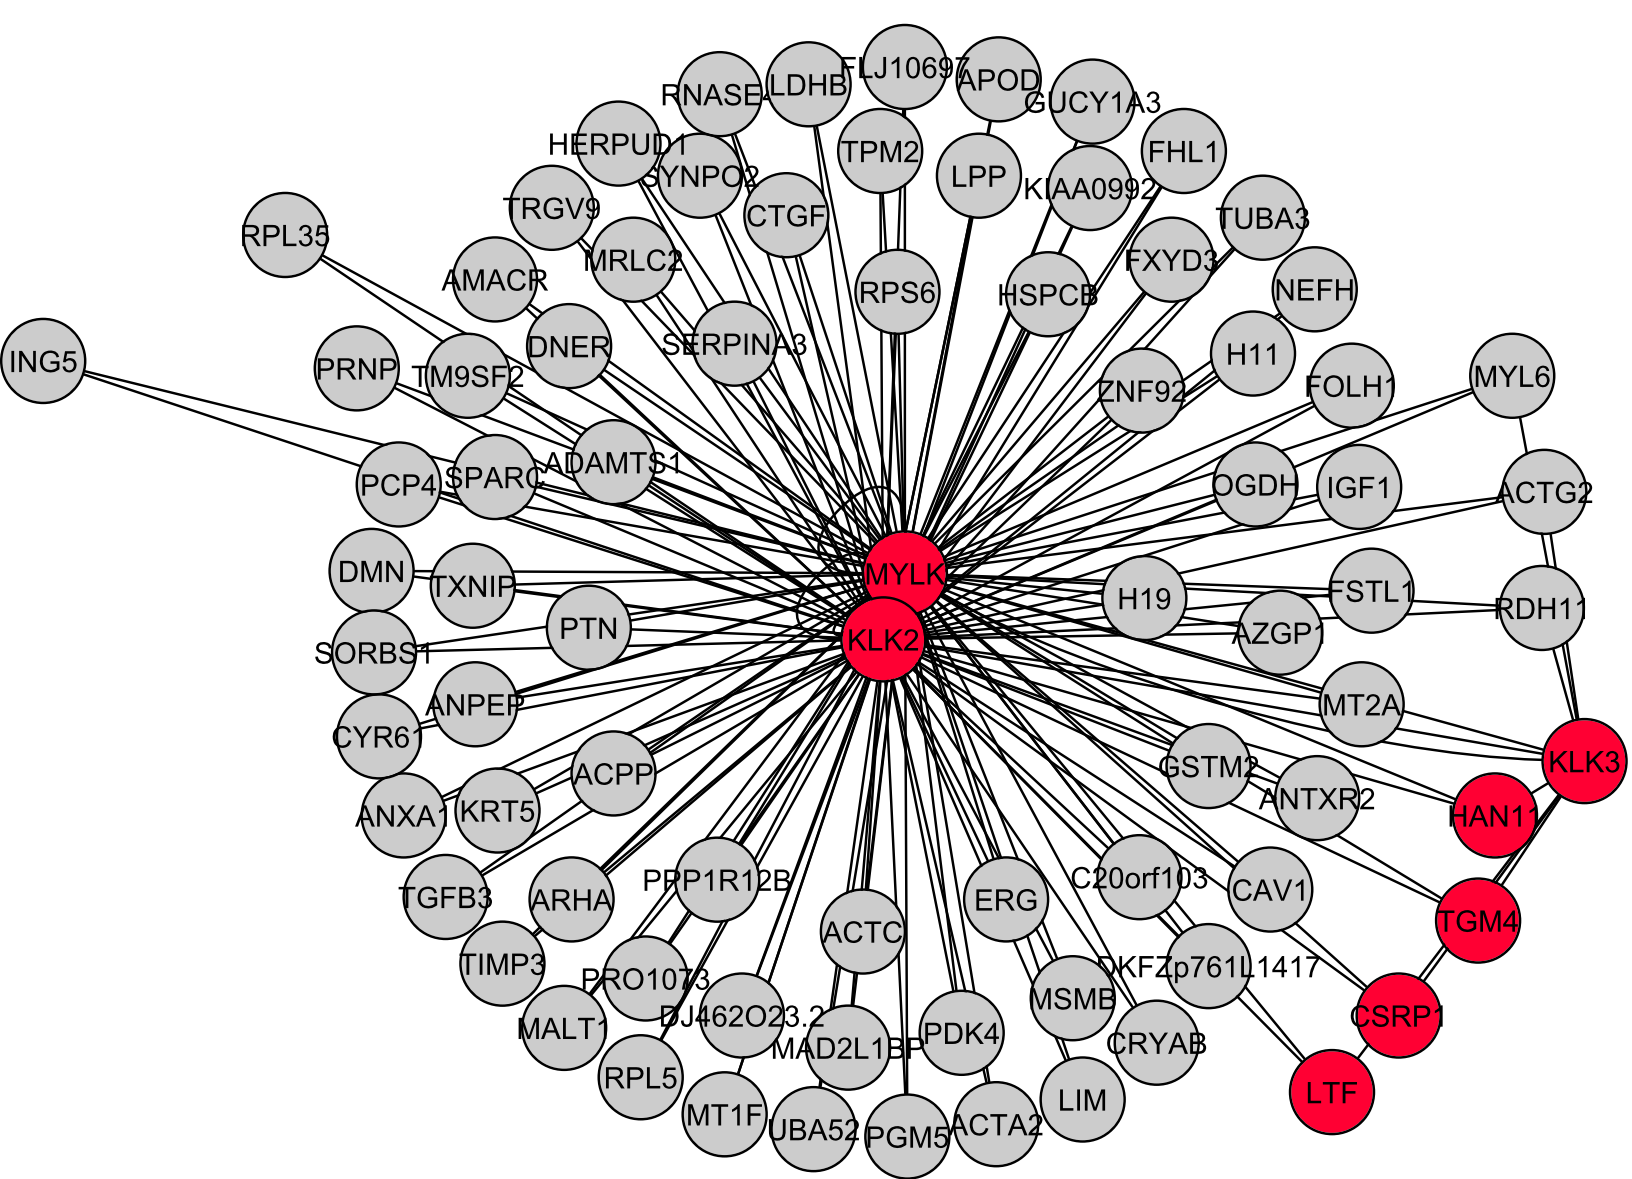

Supplement: 12918_2008_263_MOESM7_ESM.pdf [file 12918_2008_263_MOESM7_ESM.pdf]
